# Supplementary material for: Impact of the phenolic O–H vs. C-ring C–H bond cleavage on the antioxidant potency of dihydrokaempferol
Source: Royal Society of Chemistry journal article supplement (doi:10.1039/d1nj00690h), 2021-01-01
Supplement: d1nj00690h1.pdf [file d1nj00690h1.pdf]

## ELECTRONIC SUPPLEMENTARY INFORMATION

### Impact of the phenolic O–H vs C-ring C–H bond cleavage on the antioxidant potency of dihydrokaempferol

Ana Amić<sup>1\*</sup>, Dejan Milenković<sup>2</sup>, Zoran Marković<sup>2</sup>, Denisa Cagardová<sup>3</sup>, Jaime Rodríguez-Guerra Pedregal<sup>4</sup> and Jasmina M. Dimitrić Marković<sup>5</sup>

<sup>1</sup> Department of Chemistry, Josip Juraj Strossmayer University of Osijek, Ulica cara Hadrijana 8A, 31000 Osijek, Croatia  
e-mail: aamic@kemija.unios.hr

<sup>2</sup> Institute for Information Technologies, Department of Science, University of Kragujevac, 34000 Kragujevac, Serbia  
e-mail: deki82@kg.ac.rs; zmarkovic@uni.kg.ac.rs

<sup>3</sup> Institute of Physical Chemistry and Chemical Physics, Department of Chemical Physics, Slovak University of Technology in Bratislava, Radlinského 9, SK-812 37 Bratislava, Slovak Republic  
e-mail: denisa.cagardova@stuba.sk

<sup>4</sup> In Silico Toxicology, Institute of Physiology, Charité – Universitätsmedizin Berlin, Charitéplatz 1, 10117 Berlin, Germany  
e-mail: jaime.rodriguez@charite.de

<sup>5</sup> The Faculty of Physical Chemistry, University of Belgrade, Studentski trg 12-16, 11000 Belgrade, Serbia  
e-mail: markovich@ffh.bg.ac.rs

*\*corresponding author*

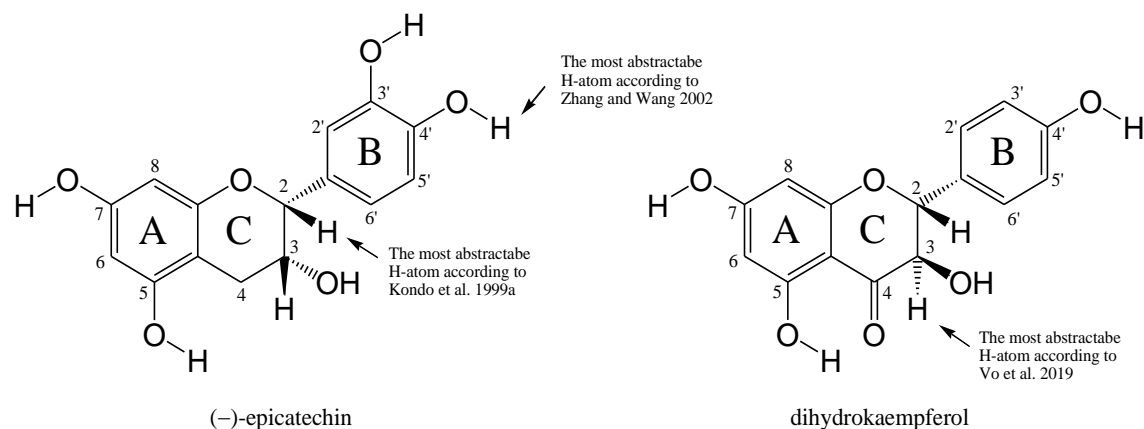

**Fig. S1** Proposed preferred sites for the hydrogen atom abstraction for (-)-epicatechin and dihydrokaempferol.

**Table S1.** Dihydrokaempferol structure.

|                                                                                                                                                                                 | dihedral angle |         |
|---------------------------------------------------------------------------------------------------------------------------------------------------------------------------------|----------------|---------|
| 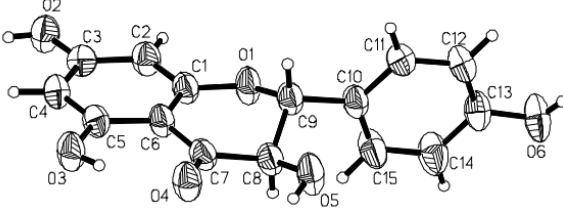 <p>experimental structure in methanol<sup>26</sup></p>                                       | C8 C9 C10 C15  | 52.8°   |
|                                                                                                                                                                                 | C8 C9 C10 C11  | -122.4° |
|                                                                                                                                                                                 | O5 C8 C9 C10   | 60.4°   |
|                                                                                                                                                                                 | O1 C9 C10 C15  | -65.8°  |
|  <p>calculated in gas-phase – this work<br/>E(RM062X) = -1030.07613233 a.u.</p>              | C8 C9 C10 C15  | -82.9°  |
|                                                                                                                                                                                 | C8 C9 C10 C11  | 94.2°   |
|                                                                                                                                                                                 | O5 C8 C9 C10   | 60.4°   |
|                                                                                                                                                                                 | O1 C9 C10 C15  | 156.5°  |
|  <p>structure by Vo et al. in gas-phase<sup>11</sup><br/>E(RM062X) = -1030.06838504 a.u.</p> | C8 C9 C10 C15  | 3.2°    |
|                                                                                                                                                                                 | C8 C9 C10 C11  | -177.7° |
|                                                                                                                                                                                 | O5 C8 C9 C10   | 170.4°  |
|                                                                                                                                                                                 | O1 C9 C10 C15  | -121.7° |

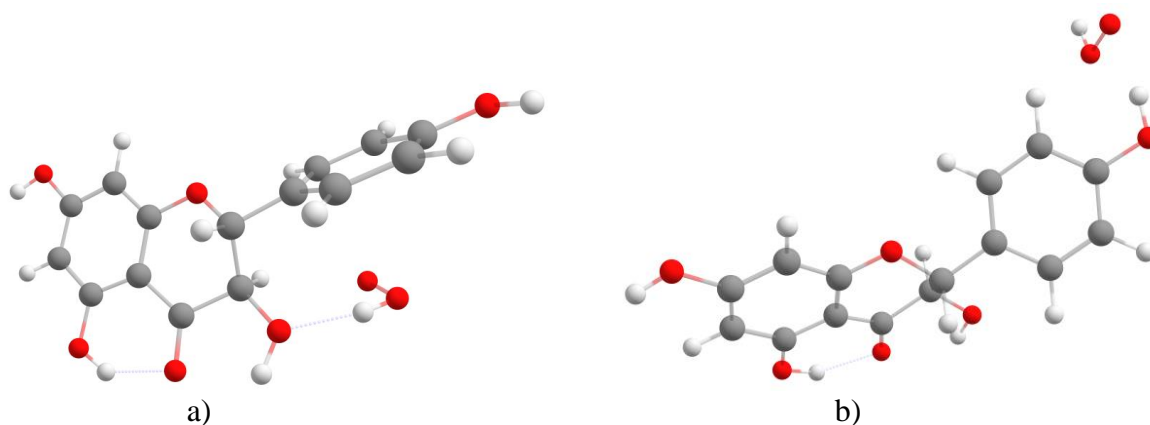

**Fig. S2** Hydrogen bonding in: a) C3-H...<sup>•</sup>OOH RC, b) C4'-OH...<sup>•</sup>OOH RC related to Fig. 2.

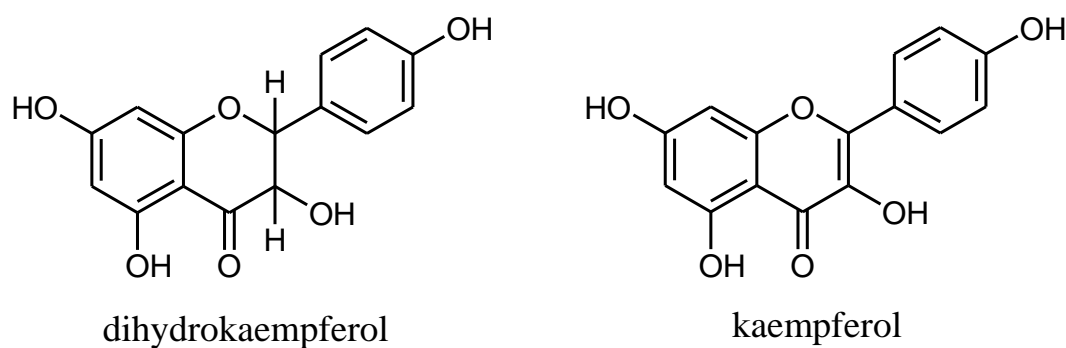

**Fig. S3** Structure of dihydrokaempferol and kaempferol.

**Table S2.** The QTAIM properties (in a.u.) of the transferred hydrogen specie in RC, TS, and PC for reaction of dihydrokaempferol C4'-OH site with <sup>•</sup>OOH.

| QTAIM property              | RC    | transoid TS<br>above B ring<br>PCET | transoid TS<br>below B ring<br>PCET | cisoid TS<br>above B ring<br>PCET/HAT | cisoid TS<br>below B ring<br>PCET/HAT | PC    |
|-----------------------------|-------|-------------------------------------|-------------------------------------|---------------------------------------|---------------------------------------|-------|
| density (H)                 | 0.382 | 0.379                               | 0.380                               | 0.397                                 | 0.401                                 | 0.364 |
| charge $q(\text{H})$        | 0.618 | 0.621                               | 0.620                               | 0.603                                 | 0.599                                 | 0.636 |
| volume $V(\text{H})$        | 13.43 | 8.662                               | 8.632                               | 9.273                                 | 9.373                                 | 11.33 |
| dipole moment $d(\text{H})$ | 0.131 | 0.015                               | 0.014                               | 0.022                                 | 0.021                                 | 0.118 |

**Table S3.** Published  $pK_a$  values (and order of acidity) for kaempferol

| $pK_{a1}$   | $pK_{a2}$    | $pK_{a3}$    | reference |
|-------------|--------------|--------------|-----------|
| 7.49 (7-OH) | 9.12 (4'-OH) | 10.90 (3-OH) | i         |
| 7.49 (7-OH) | 7.96 (4'-OH) | 11.05 (5-OH) | ii        |
| 7.05 (7-OH) | 9.04 (4'-OH) | 11.04 (5-OH) | iii       |
| 8.20 (7-OH) | 9.50 (4'-OH) | 10.50 (3-OH) | iv        |

## References

- i. R. Alvarez-Diduk, M. T. Ramirez-Silva, A. Galano and A. Merkoci, *J. Phys. Chem. B*, 2013, **117**, 12347–12359.
- ii. I. Matei, C. Tablet, S. Ionescu and M. Hillebrand, *Rev. Roum. Chim.*, 2014, **59**, 401–405.
- iii. J. M. Herrero-Martinez, M. Sanmartin, M. Roses, E. Bosch and C. Rafols, *Electrophoresis*, 2005, **26**, 1886–1895.
- iv. N. A. Tyukavkina and N. N. Pogodaeva, *Khim. Prirodn. Soedin.*, 1975, **11**, 708–711.

## Cartesian coordinates of dihydrokaempferol in gas-phase

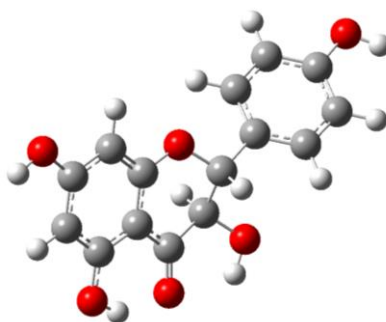

|   |              |              |              |
|---|--------------|--------------|--------------|
| 6 | 2.080838000  | 0.497040000  | -0.057832000 |
| 6 | 1.476492000  | -0.776174000 | 0.051368000  |
| 6 | 1.258053000  | 1.666618000  | -0.243376000 |
| 6 | 3.494232000  | 0.583668000  | -0.047246000 |
| 8 | 0.131714000  | -0.916931000 | 0.060687000  |
| 6 | 2.236306000  | -1.925049000 | 0.137847000  |
| 6 | -0.230040000 | 1.418768000  | -0.422492000 |
| 8 | 1.681253000  | 2.819203000  | -0.276400000 |
| 6 | 4.264849000  | -0.566942000 | 0.038121000  |
| 8 | 4.116868000  | 1.760632000  | -0.135794000 |
| 6 | -0.647154000 | 0.222949000  | 0.437508000  |
| 6 | 3.627361000  | -1.803431000 | 0.122196000  |
| 8 | -0.968029000 | 2.547372000  | -0.060688000 |
| 6 | -2.102815000 | -0.119145000 | 0.272437000  |
| 8 | 4.328138000  | -2.953481000 | 0.209173000  |
| 6 | -2.520871000 | -1.085352000 | -0.641950000 |
| 6 | -3.059465000 | 0.581221000  | 1.001061000  |
| 6 | -3.870120000 | -1.351917000 | -0.822887000 |
| 6 | -4.412800000 | 0.325778000  | 0.822513000  |
| 6 | -4.818630000 | -0.643188000 | -0.091274000 |
| 8 | -6.128954000 | -0.942315000 | -0.309157000 |
| 1 | 1.768435000  | -2.894658000 | 0.232823000  |
| 1 | -0.393496000 | 1.149815000  | -1.479182000 |
| 1 | 5.344655000  | -0.479657000 | 0.037792000  |
| 1 | 3.445538000  | 2.468189000  | -0.184896000 |
| 1 | -0.431281000 | 0.465021000  | 1.486589000  |
| 1 | -0.376579000 | 3.307301000  | -0.147880000 |
| 1 | 5.271767000  | -2.768109000 | 0.204404000  |
| 1 | -1.782756000 | -1.642462000 | -1.205738000 |
| 1 | -2.745628000 | 1.346363000  | 1.701949000  |
| 1 | -4.207914000 | -2.104996000 | -1.523852000 |
| 1 | -5.152152000 | 0.878825000  | 1.393087000  |
| 1 | -6.685939000 | -0.390542000 | 0.246364000  |

Cartesian coordinates of TS dihydrokaempferol C2-H...OOH  
 imaginary frequency =  $-1910.28 \text{ cm}^{-1}$

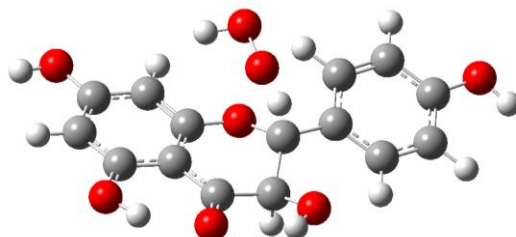

|   |              |              |              |
|---|--------------|--------------|--------------|
| 6 | 2.080835000  | 0.578564000  | -0.288142000 |
| 6 | 1.402230000  | -0.640558000 | -0.481677000 |
| 6 | 1.329056000  | 1.805876000  | -0.208872000 |
| 6 | 3.491191000  | 0.560852000  | -0.174096000 |
| 8 | 0.051985000  | -0.684501000 | -0.570315000 |
| 6 | 2.081435000  | -1.838642000 | -0.587043000 |
| 6 | -0.167311000 | 1.724907000  | -0.493565000 |
| 8 | 1.815659000  | 2.899109000  | 0.056987000  |
| 6 | 4.186246000  | -0.636673000 | -0.288664000 |
| 8 | 4.187137000  | 1.678270000  | 0.033120000  |
| 6 | -0.700834000 | 0.379013000  | -0.026279000 |
| 6 | 3.477155000  | -1.816417000 | -0.499436000 |
| 8 | -0.827052000 | 2.787260000  | 0.127465000  |
| 6 | -2.142230000 | 0.066990000  | -0.139178000 |
| 8 | 4.099328000  | -3.007602000 | -0.611824000 |
| 6 | -2.554602000 | -1.258887000 | 0.066151000  |
| 6 | -3.110521000 | 1.040558000  | -0.398686000 |
| 6 | -3.889253000 | -1.607543000 | -0.006319000 |
| 6 | -4.452441000 | 0.692992000  | -0.474972000 |
| 6 | -4.844460000 | -0.628588000 | -0.280137000 |
| 8 | -6.142112000 | -1.023721000 | -0.340851000 |
| 1 | 1.551093000  | -2.768936000 | -0.736110000 |
| 1 | 5.266394000  | -0.627341000 | -0.205315000 |
| 1 | 3.566752000  | 2.425492000  | 0.128451000  |
| 1 | -0.418097000 | 0.333080000  | 1.231314000  |
| 1 | -0.155661000 | 3.454716000  | 0.328316000  |
| 1 | 5.051106000  | -2.896226000 | -0.528546000 |
| 1 | -1.810544000 | -2.013612000 | 0.288541000  |
| 1 | -2.822099000 | 2.074133000  | -0.534264000 |
| 1 | -4.216534000 | -2.627566000 | 0.150331000  |
| 1 | -5.197460000 | 1.454634000  | -0.682633000 |
| 1 | -6.707974000 | -0.265766000 | -0.510987000 |
| 8 | 0.192632000  | -1.344314000 | 2.281237000  |
| 1 | 1.090660000  | -1.522336000 | 1.962939000  |
| 8 | 0.118001000  | 0.029051000  | 2.322354000  |
| 1 | -0.281250000 | 1.776662000  | -1.591937000 |

Cartesian coordinates of TS dihydrokaempferol C3-H...OOH  
 imaginary frequency  $-1965.40\text{ cm}^{-1}$

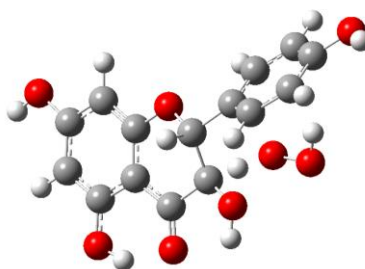

|   |              |              |              |
|---|--------------|--------------|--------------|
| 6 | -2.236327000 | 0.429961000  | -0.180538000 |
| 6 | -1.694714000 | -0.875428000 | -0.186760000 |
| 6 | -1.361100000 | 1.575176000  | -0.247749000 |
| 6 | -3.637638000 | 0.585488000  | -0.050373000 |
| 8 | -0.361249000 | -1.094683000 | -0.290944000 |
| 6 | -2.501422000 | -1.986223000 | -0.053438000 |
| 6 | 0.097375000  | 1.269817000  | -0.252407000 |
| 8 | -1.730504000 | 2.749231000  | -0.278634000 |
| 6 | -4.455473000 | -0.527598000 | 0.083318000  |
| 8 | -4.202296000 | 1.794072000  | -0.040306000 |
| 6 | 0.451946000  | -0.076092000 | -0.865790000 |
| 6 | -3.877848000 | -1.795161000 | 0.087108000  |
| 8 | 0.879466000  | 2.281258000  | -0.723444000 |
| 6 | 1.898821000  | -0.430695000 | -0.634161000 |
| 8 | -4.625703000 | -2.911217000 | 0.215429000  |
| 6 | 2.281851000  | -1.209715000 | 0.459289000  |
| 6 | 2.880386000  | 0.098812000  | -1.465340000 |
| 6 | 3.624779000  | -1.444577000 | 0.722767000  |
| 6 | 4.227056000  | -0.132138000 | -1.211015000 |
| 6 | 4.600985000  | -0.904245000 | -0.113889000 |
| 8 | 5.898503000  | -1.169622000 | 0.190034000  |
| 1 | -2.081251000 | -2.981761000 | -0.061595000 |
| 1 | -5.524545000 | -0.385923000 | 0.187410000  |
| 1 | -3.503065000 | 2.470762000  | -0.128080000 |
| 1 | 0.245548000  | -0.026010000 | -1.945537000 |
| 1 | 0.390607000  | 3.107610000  | -0.585652000 |
| 1 | -5.554183000 | -2.678684000 | 0.307679000  |
| 1 | 1.523456000  | -1.622039000 | 1.112665000  |
| 1 | 2.595141000  | 0.715421000  | -2.310347000 |
| 1 | 3.934660000  | -2.050002000 | 1.565692000  |
| 1 | 4.984506000  | 0.288089000  | -1.864695000 |
| 1 | 6.479446000  | -0.743289000 | -0.445734000 |
| 8 | 2.150274000  | 1.632184000  | 1.941554000  |
| 1 | 2.736533000  | 0.921627000  | 1.629582000  |
| 8 | 0.942908000  | 1.018857000  | 2.109064000  |
| 1 | 0.369903000  | 1.119279000  | 1.010452000  |

Cartesian coordinates of TS dihydrokaempferol 5-OH...•OOH  
 imaginary frequency =  $-2429.04 \text{ cm}^{-1}$

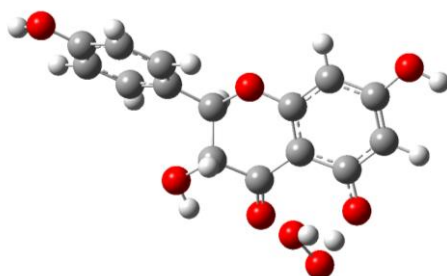

|   |              |              |              |
|---|--------------|--------------|--------------|
| 6 | 1.783672000  | -0.086700000 | -0.366236000 |
| 6 | 1.056964000  | 1.099565000  | -0.210889000 |
| 6 | 1.049937000  | -1.358823000 | -0.464452000 |
| 6 | 3.214192000  | -0.010228000 | -0.395261000 |
| 8 | -0.292440000 | 1.135097000  | -0.155917000 |
| 6 | 1.695912000  | 2.332853000  | -0.099711000 |
| 6 | -0.415369000 | -1.274729000 | -0.058163000 |
| 8 | 1.507216000  | -2.410682000 | -0.846551000 |
| 6 | 3.849778000  | 1.242951000  | -0.258649000 |
| 8 | 3.955342000  | -1.062249000 | -0.543901000 |
| 6 | -1.012462000 | 0.003248000  | -0.656076000 |
| 6 | 3.091321000  | 2.393259000  | -0.126863000 |
| 8 | -1.115930000 | -2.388799000 | -0.516362000 |
| 6 | -2.467254000 | 0.179496000  | -0.316106000 |
| 8 | 3.641139000  | 3.622932000  | -0.012494000 |
| 6 | -2.870661000 | 0.955109000  | 0.770087000  |
| 6 | -3.432570000 | -0.483241000 | -1.068480000 |
| 6 | -4.213723000 | 1.073801000  | 1.096760000  |
| 6 | -4.778630000 | -0.376033000 | -0.745501000 |
| 6 | -5.170301000 | 0.405519000  | 0.338567000  |
| 8 | -6.474449000 | 0.555745000  | 0.700429000  |
| 1 | 1.110994000  | 3.238118000  | -0.004529000 |
| 1 | 4.933200000  | 1.263405000  | -0.273579000 |
| 1 | 3.697081000  | -1.919133000 | 0.233756000  |
| 1 | -0.883400000 | -0.037054000 | -1.746253000 |
| 1 | -0.451471000 | -3.057175000 | -0.738792000 |
| 1 | 4.599336000  | 3.564752000  | -0.070700000 |
| 1 | -2.127587000 | 1.482673000  | 1.355202000  |
| 1 | -3.129101000 | -1.102046000 | -1.904996000 |
| 1 | -4.538836000 | 1.680650000  | 1.932586000  |
| 1 | -5.524293000 | -0.898455000 | -1.336350000 |
| 1 | -7.037622000 | 0.055799000  | 0.103831000  |
| 8 | 2.526704000  | -1.789360000 | 1.857091000  |
| 1 | 2.909064000  | -1.387802000 | 2.650662000  |
| 8 | 3.578914000  | -2.446082000 | 1.283338000  |
| 1 | -0.454154000 | -1.192830000 | 1.039927000  |



Cartesian coordinates of TS dihydrokaempferol 7-OH...•OOH  
 imaginary frequency =  $-2267.49 \text{ cm}^{-1}$

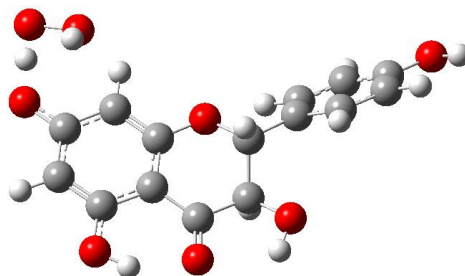

|   |              |              |              |
|---|--------------|--------------|--------------|
| 6 | 1.569491000  | 1.169894000  | -0.167452000 |
| 6 | 1.160892000  | -0.165715000 | -0.346163000 |
| 6 | 0.557199000  | 2.199899000  | -0.006471000 |
| 6 | 2.961680000  | 1.493395000  | -0.207586000 |
| 8 | -0.140940000 | -0.528655000 | -0.304676000 |
| 6 | 2.088606000  | -1.160537000 | -0.599688000 |
| 6 | -0.884699000 | 1.759331000  | -0.183637000 |
| 8 | 0.802335000  | 3.372971000  | 0.245050000  |
| 6 | 3.894114000  | 0.509173000  | -0.446796000 |
| 8 | 3.380314000  | 2.748855000  | -0.020292000 |
| 6 | -1.048607000 | 0.344144000  | 0.375879000  |
| 6 | 3.467231000  | -0.820931000 | -0.664859000 |
| 8 | -1.757047000 | 2.631595000  | 0.467112000  |
| 6 | -2.444230000 | -0.184607000 | 0.194529000  |
| 8 | 4.345905000  | -1.743222000 | -0.921968000 |
| 6 | -2.798959000 | -0.902193000 | -0.947842000 |
| 6 | -3.417515000 | 0.094380000  | 1.147968000  |
| 6 | -4.101646000 | -1.339226000 | -1.132286000 |
| 6 | -4.726704000 | -0.333667000 | 0.969608000  |
| 6 | -5.068989000 | -1.052490000 | -0.172897000 |
| 8 | -6.330884000 | -1.505679000 | -0.403485000 |
| 1 | 1.770603000  | -2.183382000 | -0.747243000 |
| 1 | -1.081839000 | 1.718908000  | -1.268100000 |
| 1 | 4.948773000  | 0.744844000  | -0.485079000 |
| 1 | 2.612844000  | 3.323467000  | 0.150219000  |
| 1 | -0.786186000 | 0.363596000  | 1.442209000  |
| 1 | -1.307242000 | 3.484045000  | 0.539182000  |
| 1 | 4.272380000  | -2.646118000 | -0.139068000 |
| 1 | -2.044973000 | -1.132757000 | -1.690850000 |
| 1 | -3.156026000 | 0.663922000  | 2.032724000  |
| 1 | -4.387898000 | -1.905516000 | -2.009739000 |
| 1 | -5.480003000 | -0.112637000 | 1.719074000  |
| 1 | -6.910731000 | -1.240471000 | 0.315292000  |
| 8 | 4.209991000  | -3.259417000 | 0.847158000  |
| 8 | 3.097398000  | -2.769493000 | 1.468125000  |
| 1 | 3.446550000  | -2.318666000 | 2.251349000  |

Cartesian coordinates of TS dihydrokaempferol 4'-OH...OOH cisoid below B-ring  
 imaginary frequency =  $-2081.62 \text{ cm}^{-1}$

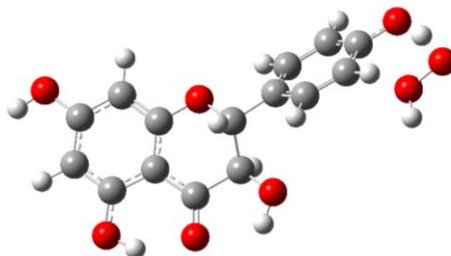

|   |              |              |              |
|---|--------------|--------------|--------------|
| 6 | 2.673170000  | 0.511018000  | -0.081253000 |
| 6 | 2.112253000  | -0.779864000 | 0.050827000  |
| 6 | 1.811404000  | 1.664863000  | -0.137827000 |
| 6 | 4.077262000  | 0.631217000  | -0.224043000 |
| 8 | 0.776943000  | -0.952905000 | 0.203535000  |
| 6 | 2.898241000  | -1.911920000 | 0.015178000  |
| 6 | 0.317761000  | 1.383991000  | -0.166542000 |
| 8 | 2.199345000  | 2.828854000  | -0.176682000 |
| 6 | 4.875426000  | -0.503164000 | -0.263464000 |
| 8 | 4.662899000  | 1.823992000  | -0.341465000 |
| 6 | 0.029068000  | 0.155811000  | 0.703009000  |
| 6 | 4.277234000  | -1.756664000 | -0.150492000 |
| 8 | -0.408862000 | 2.482379000  | 0.294199000  |
| 6 | -1.429981000 | -0.204996000 | 0.689249000  |
| 8 | 5.004943000  | -2.891187000 | -0.178550000 |
| 6 | -1.930938000 | -1.116625000 | -0.242280000 |
| 6 | -2.300661000 | 0.434105000  | 1.583704000  |
| 6 | -3.285377000 | -1.393624000 | -0.283784000 |
| 6 | -3.653327000 | 0.172163000  | 1.547986000  |
| 6 | -4.172813000 | -0.758080000 | 0.616657000  |
| 8 | -5.456425000 | -1.026121000 | 0.603791000  |
| 1 | 2.463486000  | -2.894937000 | 0.128416000  |
| 1 | 0.053103000  | 1.129866000  | -1.206095000 |
| 1 | 5.946515000  | -0.389709000 | -0.380376000 |
| 1 | 3.979476000  | 2.519141000  | -0.292255000 |
| 1 | 0.354664000  | 0.373772000  | 1.728773000  |
| 1 | 0.157972000  | 3.258732000  | 0.185820000  |
| 1 | 5.938781000  | -2.685451000 | -0.281162000 |
| 1 | -1.250938000 | -1.611025000 | -0.924744000 |
| 1 | -1.901149000 | 1.151000000  | 2.292013000  |
| 1 | -3.697695000 | -2.094973000 | -0.998989000 |
| 1 | -4.346189000 | 0.650244000  | 2.229770000  |
| 1 | -5.927384000 | -0.643143000 | -0.367170000 |
| 8 | -6.179650000 | 0.021491000  | -1.358649000 |
| 8 | -4.945396000 | 0.317031000  | -1.853735000 |
| 1 | -4.793348000 | 1.238812000  | -1.595106000 |

Cartesian coordinates of TS dihydrokaempferol 4'-OH...OOH cisoid above B-ring  
 imaginary frequency =  $-2187.47 \text{ cm}^{-1}$

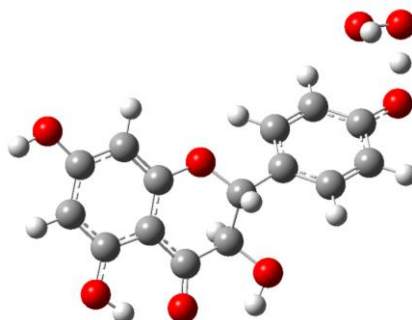

|   |              |              |              |
|---|--------------|--------------|--------------|
| 6 | 2.768369000  | -0.359100000 | 0.011005000  |
| 6 | 1.951758000  | 0.794332000  | 0.015432000  |
| 6 | 2.167127000  | -1.662874000 | 0.136855000  |
| 6 | 4.174273000  | -0.197099000 | -0.045106000 |
| 8 | 0.601283000  | 0.697659000  | 0.056352000  |
| 6 | 2.496762000  | 2.060677000  | -0.004627000 |
| 6 | 0.666970000  | -1.691533000 | 0.384047000  |
| 8 | 2.779392000  | -2.724763000 | 0.071977000  |
| 6 | 4.731278000  | 1.073632000  | -0.063403000 |
| 8 | 4.993504000  | -1.249467000 | -0.063889000 |
| 6 | 0.016787000  | -0.530248000 | -0.375994000 |
| 6 | 3.888484000  | 2.182943000  | -0.035128000 |
| 8 | 0.117944000  | -2.905121000 | -0.031067000 |
| 6 | -1.468128000 | -0.459423000 | -0.142426000 |
| 8 | 4.374772000  | 3.440371000  | -0.051791000 |
| 6 | -2.010805000 | 0.453670000  | 0.762800000  |
| 6 | -2.308564000 | -1.355822000 | -0.822710000 |
| 6 | -3.375303000 | 0.478083000  | 0.993595000  |
| 6 | -3.668895000 | -1.335267000 | -0.608683000 |
| 6 | -4.230676000 | -0.422435000 | 0.316337000  |
| 8 | -5.521876000 | -0.432334000 | 0.540061000  |
| 1 | 1.866441000  | 2.938639000  | -0.009028000 |
| 1 | 0.508214000  | -1.521645000 | 1.461470000  |
| 1 | 5.809145000  | 1.176430000  | -0.098235000 |
| 1 | 4.460122000  | -2.066777000 | -0.048644000 |
| 1 | 0.221978000  | -0.664958000 | -1.446829000 |
| 1 | 0.834483000  | -3.554829000 | -0.021806000 |
| 1 | 5.336031000  | 3.426253000  | -0.079203000 |
| 1 | -1.359047000 | 1.149856000  | 1.274236000  |
| 1 | -1.874053000 | -2.071202000 | -1.511023000 |
| 1 | -3.816158000 | 1.182543000  | 1.688233000  |
| 1 | -4.337420000 | -2.016227000 | -1.121104000 |
| 1 | -5.980889000 | 0.583711000  | 0.298413000  |
| 8 | -6.254794000 | 1.647077000  | -0.244156000 |
| 8 | -5.030986000 | 2.176120000  | -0.531139000 |
| 1 | -4.939399000 | 2.064661000  | -1.489221000 |

Cartesian coordinates of TS dihydrokaempferol 4'-OH...OOH transoid below B-ring  
 imaginary frequency =  $-2739.89 \text{ cm}^{-1}$

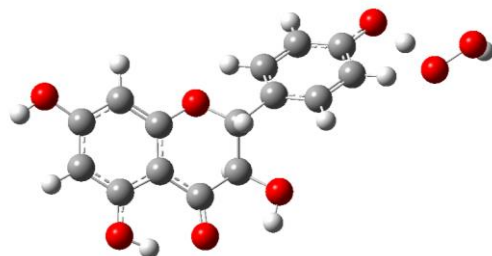

|   |              |              |              |
|---|--------------|--------------|--------------|
| 6 | 2.860178000  | 0.557420000  | -0.065170000 |
| 6 | 2.329689000  | -0.748289000 | 0.037810000  |
| 6 | 1.971087000  | 1.681211000  | -0.221995000 |
| 6 | 4.266922000  | 0.721288000  | -0.074825000 |
| 8 | 0.992653000  | -0.962839000 | 0.062394000  |
| 6 | 3.149978000  | -1.854688000 | 0.100710000  |
| 6 | 0.494130000  | 1.355678000  | -0.381762000 |
| 8 | 2.326845000  | 2.855729000  | -0.246711000 |
| 6 | 5.099946000  | -0.386977000 | -0.014681000 |
| 8 | 4.824067000  | 1.930407000  | -0.158749000 |
| 6 | 0.161078000  | 0.124176000  | 0.468157000  |
| 6 | 4.532753000  | -1.657254000 | 0.065468000  |
| 8 | -0.298858000 | 2.434554000  | 0.009353000  |
| 6 | -1.276028000 | -0.293858000 | 0.319533000  |
| 8 | 5.294949000  | -2.767849000 | 0.129640000  |
| 6 | -1.638279000 | -1.329646000 | -0.551854000 |
| 6 | -2.264230000 | 0.396675000  | 1.031067000  |
| 6 | -2.965353000 | -1.666686000 | -0.718602000 |
| 6 | -3.593826000 | 0.055857000  | 0.892775000  |
| 6 | -3.968237000 | -0.988907000 | 0.011416000  |
| 8 | -5.218432000 | -1.350486000 | -0.119770000 |
| 1 | 2.737065000  | -2.849349000 | 0.190948000  |
| 1 | 0.328460000  | 1.092499000  | -1.439439000 |
| 1 | 6.173182000  | -0.240344000 | -0.029603000 |
| 1 | 4.117558000  | 2.603493000  | -0.186691000 |
| 1 | 0.375671000  | 0.364692000  | 1.518078000  |
| 1 | 0.243539000  | 3.230156000  | -0.080721000 |
| 1 | 6.227493000  | -2.532914000 | 0.111981000  |
| 1 | -0.866123000 | -1.864710000 | -1.089845000 |
| 1 | -1.976398000 | 1.206938000  | 1.690345000  |
| 1 | -3.273104000 | -2.458542000 | -1.390258000 |
| 1 | -4.370347000 | 0.573475000  | 1.443404000  |
| 1 | -5.885365000 | -0.418193000 | -0.121136000 |
| 8 | -6.472441000 | 0.608489000  | -0.359495000 |
| 8 | -7.763084000 | 0.370763000  | 0.029058000  |
| 1 | -8.276061000 | 0.546636000  | -0.771119000 |

Cartesian coordinates of TS dihydrokaempferol 4'-OH...OOH transoid above B-ring  
 imaginary frequency =  $-2727.17 \text{ cm}^{-1}$

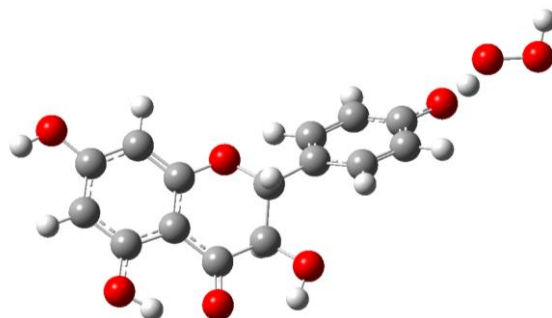

|   |              |              |              |
|---|--------------|--------------|--------------|
| 6 | -2.904078000 | 0.447597000  | -0.028854000 |
| 6 | -2.239530000 | -0.799348000 | -0.009269000 |
| 6 | -2.155221000 | 1.663319000  | 0.171585000  |
| 6 | -4.311735000 | 0.464926000  | -0.185816000 |
| 8 | -0.892814000 | -0.873941000 | 0.122027000  |
| 6 | -2.933899000 | -1.986284000 | -0.108577000 |
| 6 | -0.680666000 | 1.498030000  | 0.501712000  |
| 8 | -2.626828000 | 2.794350000  | 0.101894000  |
| 6 | -5.018790000 | -0.724956000 | -0.285092000 |
| 8 | -4.992138000 | 1.611498000  | -0.225566000 |
| 6 | -0.139630000 | 0.279347000  | -0.254025000 |
| 6 | -4.324302000 | -1.931828000 | -0.238927000 |
| 8 | 0.040026000  | 2.639338000  | 0.150116000  |
| 6 | 1.310948000  | 0.027202000  | 0.049036000  |
| 8 | -4.960524000 | -3.116980000 | -0.334012000 |
| 6 | 1.692703000  | -0.898630000 | 1.029671000  |
| 6 | 2.285248000  | 0.770868000  | -0.625866000 |
| 6 | 3.026658000  | -1.093479000 | 1.319705000  |
| 6 | 3.622200000  | 0.609679000  | -0.325959000 |
| 6 | 4.017097000  | -0.332932000 | 0.656139000  |
| 8 | 5.276499000  | -0.500200000 | 0.966343000  |
| 1 | -2.416886000 | -2.935235000 | -0.103978000 |
| 1 | -0.606501000 | 1.287038000  | 1.581259000  |
| 1 | -6.095692000 | -0.689865000 | -0.398034000 |
| 1 | -4.365262000 | 2.355541000  | -0.148490000 |
| 1 | -0.272460000 | 0.456028000  | -1.329824000 |
| 1 | -0.587744000 | 3.374904000  | 0.136282000  |
| 1 | -5.906605000 | -2.979449000 | -0.438911000 |
| 1 | 0.931428000  | -1.475532000 | 1.539570000  |
| 1 | 1.978875000  | 1.495478000  | -1.371138000 |
| 1 | 3.351804000  | -1.816719000 | 2.057380000  |
| 1 | 4.388764000  | 1.185358000  | -0.830656000 |
| 1 | 5.904941000  | -0.449892000 | 0.009843000  |
| 8 | 6.422541000  | -0.627576000 | -1.067842000 |
| 8 | 7.732387000  | -0.266101000 | -0.902070000 |
| 1 | 8.220123000  | -1.051843000 | -1.183208000 |

## Cartesian coordinates of kaempferol in gas-phase

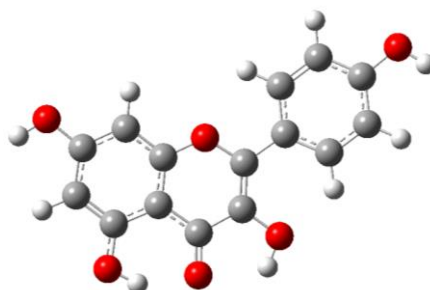

|   |              |              |              |
|---|--------------|--------------|--------------|
| 6 | 4.214370000  | -0.686658000 | 0.016204000  |
| 6 | 3.518284000  | 0.509100000  | -0.003041000 |
| 6 | 2.101073000  | 0.499267000  | -0.002018000 |
| 6 | 1.437709000  | -0.733760000 | 0.017020000  |
| 6 | 2.120345000  | -1.939948000 | 0.035997000  |
| 6 | 3.508999000  | -1.895041000 | 0.035207000  |
| 1 | 5.297742000  | -0.664354000 | 0.015054000  |
| 6 | 1.329626000  | 1.711413000  | -0.025195000 |
| 1 | 1.593632000  | -2.883208000 | 0.052509000  |
| 6 | -0.692929000 | 0.328992000  | 0.000104000  |
| 6 | -0.114239000 | 1.558425000  | -0.026508000 |
| 6 | -2.123546000 | 0.007483000  | 0.000631000  |
| 6 | -2.533754000 | -1.326966000 | -0.146210000 |
| 6 | -3.107719000 | 0.992992000  | 0.152590000  |
| 6 | -3.873132000 | -1.668108000 | -0.147313000 |
| 1 | -1.790577000 | -2.103844000 | -0.262810000 |
| 6 | -4.452192000 | 0.652478000  | 0.153271000  |
| 1 | -2.825984000 | 2.028103000  | 0.272843000  |
| 6 | -4.840319000 | -0.675924000 | 0.002702000  |
| 1 | -5.203235000 | 1.426758000  | 0.274090000  |
| 8 | 0.087713000  | -0.790094000 | 0.019476000  |
| 8 | 1.814819000  | 2.855313000  | -0.050830000 |
| 8 | 4.153278000  | -3.083904000 | 0.054027000  |
| 1 | 5.104498000  | -2.944838000 | 0.052752000  |
| 8 | 4.196428000  | 1.659083000  | -0.022780000 |
| 1 | 3.554190000  | 2.397763000  | -0.038960000 |
| 8 | -0.815882000 | 2.713324000  | -0.058585000 |
| 1 | -0.147666000 | 3.418857000  | -0.080169000 |
| 8 | -6.140617000 | -1.063897000 | -0.005617000 |
| 1 | -6.712059000 | -0.300149000 | 0.111774000  |
| 1 | -4.191917000 | -2.696163000 | -0.263252000 |

Cartesian coordinates of TS kaempferol 3-OH...OOH  
 imaginary frequency =  $-2975.04 \text{ cm}^{-1}$

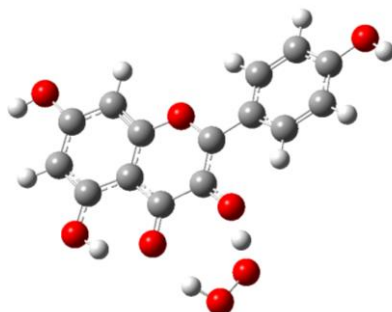

|   |              |              |              |
|---|--------------|--------------|--------------|
| 6 | 2.585598000  | -1.668835000 | 0.336651000  |
| 6 | 2.151351000  | -0.406948000 | -0.115707000 |
| 6 | 3.121468000  | 0.531807000  | -0.505853000 |
| 6 | 4.468018000  | 0.219783000  | -0.435761000 |
| 6 | 4.877356000  | -1.030304000 | 0.026630000  |
| 6 | 3.926925000  | -1.977364000 | 0.413558000  |
| 6 | 0.724186000  | -0.126439000 | -0.166271000 |
| 6 | 0.123948000  | 1.123851000  | -0.332633000 |
| 6 | -1.345616000 | 1.218657000  | -0.309669000 |
| 6 | -2.075505000 | -0.013802000 | -0.160287000 |
| 6 | -1.380649000 | -1.222004000 | -0.024983000 |
| 8 | -0.023664000 | -1.241459000 | -0.035907000 |
| 6 | -3.494407000 | -0.055907000 | -0.140324000 |
| 6 | -4.149494000 | -1.269139000 | 0.003741000  |
| 6 | -3.407993000 | -2.444618000 | 0.132730000  |
| 6 | -2.015276000 | -2.440459000 | 0.121381000  |
| 8 | -4.220374000 | 1.053961000  | -0.261083000 |
| 8 | -4.005156000 | -3.646711000 | 0.274835000  |
| 8 | -1.918854000 | 2.318855000  | -0.413851000 |
| 8 | 0.813732000  | 2.205689000  | -0.513904000 |
| 8 | 6.177910000  | -1.385198000 | 0.119306000  |
| 1 | 2.814869000  | 1.500989000  | -0.867887000 |
| 1 | 1.855677000  | -2.406546000 | 0.641145000  |
| 1 | 5.206687000  | 0.951673000  | -0.746136000 |
| 1 | 0.538704000  | 2.995843000  | 0.394427000  |
| 1 | -1.455642000 | -3.359324000 | 0.221370000  |
| 1 | -5.232939000 | -1.278532000 | 0.015202000  |
| 1 | 6.742439000  | -0.661736000 | -0.168350000 |
| 1 | -3.608383000 | 1.813273000  | -0.350146000 |
| 1 | -4.961517000 | -3.546129000 | 0.271505000  |
| 8 | 0.165607000  | 3.724339000  | 1.180798000  |
| 8 | -0.682930000 | 4.523292000  | 0.490398000  |
| 1 | 4.265331000  | -2.941598000 | 0.770812000  |
| 1 | -1.274866000 | 3.880297000  | 0.034108000  |

Cartesian coordinates of TS kaempferol 5-OH...OOH  
 imaginary frequency =  $-2138.07\text{cm}^{-1}$

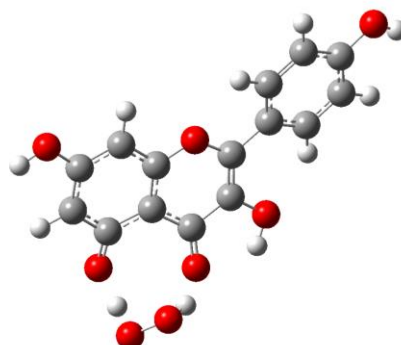

|   |              |              |              |
|---|--------------|--------------|--------------|
| 6 | 3.109356000  | 1.148815000  | 0.447142000  |
| 6 | 2.550571000  | -0.041129000 | -0.045925000 |
| 6 | 3.413376000  | -1.074204000 | -0.432707000 |
| 6 | 4.786931000  | -0.921910000 | -0.323661000 |
| 6 | 5.324181000  | 0.262350000  | 0.175217000  |
| 6 | 4.477787000  | 1.301346000  | 0.560482000  |
| 6 | 1.096372000  | -0.169802000 | -0.149604000 |
| 6 | 0.369216000  | -1.304700000 | -0.335579000 |
| 6 | -1.084461000 | -1.289939000 | -0.334425000 |
| 6 | -1.711405000 | 0.009925000  | -0.289830000 |
| 6 | -0.890968000 | 1.123284000  | -0.081244000 |
| 8 | 0.451634000  | 1.016368000  | 0.004903000  |
| 6 | -3.126601000 | 0.242060000  | -0.483376000 |
| 6 | -3.619492000 | 1.556527000  | -0.327081000 |
| 6 | -2.765691000 | 2.616762000  | -0.059323000 |
| 6 | -1.391759000 | 2.416482000  | 0.050320000  |
| 8 | -3.928857000 | -0.679026000 | -0.875105000 |
| 8 | -3.203536000 | 3.886616000  | 0.086024000  |
| 8 | -1.663371000 | -2.389516000 | -0.337437000 |
| 8 | 0.930365000  | -2.524741000 | -0.446302000 |
| 8 | 6.657957000  | 0.463066000  | 0.308297000  |
| 1 | 3.014058000  | -1.998232000 | -0.823499000 |
| 1 | 2.459662000  | 1.959342000  | 0.748815000  |
| 1 | 5.444030000  | -1.729440000 | -0.629835000 |
| 1 | 0.182312000  | -3.146553000 | -0.479318000 |
| 1 | -0.722815000 | 3.247681000  | 0.226860000  |
| 1 | -4.684634000 | 1.704410000  | -0.464851000 |
| 1 | 7.140047000  | -0.311967000 | 0.006733000  |
| 1 | -4.240931000 | -1.644316000 | -0.072990000 |
| 1 | -4.159650000 | 3.922479000  | -0.011782000 |
| 8 | -4.532652000 | -2.212315000 | 0.806169000  |
| 8 | -3.443561000 | -2.185444000 | 1.617153000  |
| 1 | 4.912107000  | 2.214786000  | 0.946644000  |
| 1 | -2.712493000 | -2.473462000 | 1.021172000  |



Cartesian coordinates of TS kaempferol 7-OH...OOH  
 imaginary frequency =  $-2807.24 \text{ cm}^{-1}$

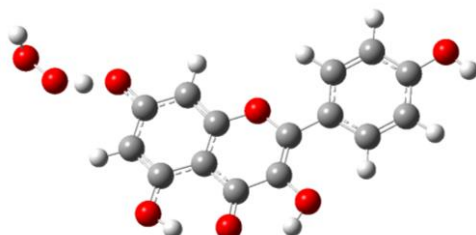

|   |              |              |              |
|---|--------------|--------------|--------------|
| 6 | -2.924265000 | -1.616330000 | 0.044595000  |
| 6 | -2.806727000 | -0.216637000 | 0.014914000  |
| 6 | -3.980094000 | 0.550442000  | 0.007814000  |
| 6 | -5.222724000 | -0.062876000 | 0.033812000  |
| 6 | -5.319781000 | -1.451770000 | 0.067768000  |
| 6 | -4.161728000 | -2.229035000 | 0.073024000  |
| 6 | -1.477014000 | 0.394531000  | -0.016040000 |
| 6 | -1.161750000 | 1.716396000  | 0.098328000  |
| 6 | 0.212290000  | 2.173578000  | 0.053314000  |
| 6 | 1.221403000  | 1.158266000  | -0.107176000 |
| 6 | 0.822702000  | -0.182584000 | -0.212925000 |
| 8 | -0.486533000 | -0.524700000 | -0.169201000 |
| 6 | 2.611086000  | 1.480267000  | -0.160918000 |
| 6 | 3.538532000  | 0.478831000  | -0.334887000 |
| 6 | 3.111555000  | -0.871224000 | -0.429589000 |
| 6 | 1.739165000  | -1.205961000 | -0.350491000 |
| 8 | 3.017439000  | 2.748326000  | -0.062238000 |
| 8 | 3.967100000  | -1.830922000 | -0.615494000 |
| 8 | 0.446017000  | 3.388465000  | 0.162597000  |
| 8 | -2.083914000 | 2.686117000  | 0.263214000  |
| 8 | -6.507033000 | -2.103453000 | 0.096648000  |
| 1 | -3.926028000 | 1.627991000  | -0.019870000 |
| 1 | -2.031646000 | -2.226955000 | 0.047680000  |
| 1 | -6.122489000 | 0.543998000  | 0.026648000  |
| 1 | -1.580141000 | 3.515921000  | 0.322227000  |
| 1 | 1.430156000  | -2.239971000 | -0.413707000 |
| 1 | 4.592335000  | 0.718750000  | -0.397283000 |
| 1 | -7.231919000 | -1.472276000 | 0.084311000  |
| 1 | 2.234943000  | 3.324596000  | 0.046270000  |
| 1 | 4.997228000  | -1.623051000 | -0.032563000 |
| 8 | 5.835827000  | -1.512061000 | 0.748902000  |
| 8 | 6.778573000  | -2.429957000 | 0.371315000  |
| 1 | -4.255775000 | -3.307247000 | 0.098946000  |
| 1 | 6.937606000  | -2.931661000 | 1.182149000  |

Cartesian coordinates of TS kaempferol 4'-OH...OOH  
 imaginary frequency =  $-2271.83 \text{ cm}^{-1}$

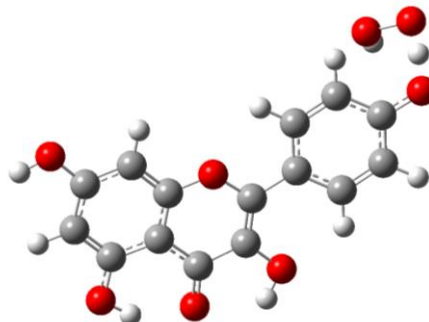

|   |              |              |              |
|---|--------------|--------------|--------------|
| 6 | -4.736005000 | -1.037278000 | 0.120444000  |
| 6 | -4.180704000 | 0.225457000  | 0.221612000  |
| 6 | -2.778323000 | 0.390787000  | 0.089714000  |
| 6 | -1.984437000 | -0.741736000 | -0.140846000 |
| 6 | -2.526486000 | -2.011775000 | -0.244969000 |
| 6 | -3.904816000 | -2.138965000 | -0.111267000 |
| 1 | -5.808931000 | -1.149874000 | 0.222668000  |
| 6 | -2.153366000 | 1.677167000  | 0.188891000  |
| 1 | -1.904031000 | -2.876256000 | -0.425970000 |
| 6 | 0.007015000  | 0.567852000  | -0.186201000 |
| 6 | -0.702769000 | 1.708420000  | 0.039711000  |
| 6 | 1.451413000  | 0.429119000  | -0.347316000 |
| 6 | 2.011809000  | -0.858587000 | -0.454605000 |
| 6 | 2.306598000  | 1.553328000  | -0.402798000 |
| 6 | 3.369072000  | -1.027118000 | -0.610341000 |
| 1 | 1.366995000  | -1.725247000 | -0.414014000 |
| 6 | 3.664169000  | 1.390046000  | -0.546902000 |
| 1 | 1.894661000  | 2.548064000  | -0.329981000 |
| 6 | 4.229597000  | 0.098217000  | -0.667361000 |
| 1 | 4.331595000  | 2.241776000  | -0.592588000 |
| 8 | -0.643929000 | -0.629691000 | -0.272132000 |
| 8 | -2.751325000 | 2.744890000  | 0.394615000  |
| 8 | -4.407763000 | -3.387361000 | -0.218277000 |
| 1 | -5.362525000 | -3.373159000 | -0.105280000 |
| 8 | -4.978041000 | 1.272195000  | 0.443380000  |
| 1 | -4.430345000 | 2.081049000  | 0.489874000  |
| 8 | -0.148737000 | 2.928832000  | 0.151115000  |
| 1 | -0.891024000 | 3.537113000  | 0.312794000  |
| 8 | 5.514919000  | -0.033548000 | -0.854012000 |
| 1 | 5.961324000  | -0.753876000 | -0.099289000 |
| 1 | 3.805607000  | -2.015122000 | -0.690149000 |
| 8 | 6.268574000  | -1.323435000 | 0.950064000  |
| 8 | 5.078152000  | -1.451361000 | 1.605444000  |
| 1 | 5.145290000  | -0.828242000 | 2.343764000  |
